# Supplementary material
Source: publisher figshare collection journal article supplement (https://acs.figshare.com/ndownloader/files/5336077)
Supplement: Supplementary file 1 [file 5336077]

 
data_50307b 
 
_audit_creation_method            SHELXL-97 
_chemical_name_systematic 
; 
 ? 
; 
_chemical_name_common             ? 
_chemical_melting_point           ? 
_chemical_formula_moiety          
' C40 H50 Cr Mn3 N4 O16 P2, 5(H2 O), H2 O, H2 O' 
_chemical_formula_sum 
 'C40 H64 Cr Mn3 N4 O23 P2' 
_chemical_formula_weight          1247.71 
 
loop_ 
 _atom_type_symbol 
 _atom_type_description 
 _atom_type_scat_dispersion_real 
 _atom_type_scat_dispersion_imag 
 _atom_type_scat_source 
 'C'  'C'   0.0033   0.0016 
 'International Tables Vol C Tables 4.2.6.8 and 6.1.1.4' 
 'H'  'H'   0.0000   0.0000 
 'International Tables Vol C Tables 4.2.6.8 and 6.1.1.4' 
 'N'  'N'   0.0061   0.0033 
 'International Tables Vol C Tables 4.2.6.8 and 6.1.1.4' 
 'O'  'O'   0.0106   0.0060 
 'International Tables Vol C Tables 4.2.6.8 and 6.1.1.4' 
 'P'  'P'   0.1023   0.0942 
 'International Tables Vol C Tables 4.2.6.8 and 6.1.1.4' 
 'Mn'  'Mn'   0.3368   0.7283 
 'International Tables Vol C Tables 4.2.6.8 and 6.1.1.4' 
 'Cr'  'Cr'   0.3209   0.6236 
 'International Tables Vol C Tables 4.2.6.8 and 6.1.1.4' 
 
_symmetry_cell_setting            triclinic
_symmetry_space_group_name_H-M    ' P -1'
_symmetry_space_group_name_Hall   '-P 1'
 
loop_ 
 _symmetry_equiv_pos_as_xyz 
 'x, y, z' 
 '-x, -y, -z' 
 
_cell_length_a                    11.302(2) 
_cell_length_b                    11.759(2) 
_cell_length_c                    12.199(2) 
_cell_angle_alpha                 100.85(3) 
_cell_angle_beta                  99.55(3) 
_cell_angle_gamma                 116.71(3) 
_cell_volume                      1363.1(5) 
_cell_formula_units_Z             1 
_cell_measurement_temperature     291(2) 
_cell_measurement_reflns_used     ? 
_cell_measurement_theta_min       ? 
_cell_measurement_theta_max       ? 
 
_exptl_crystal_description        ? 
_exptl_crystal_colour             ? 
_exptl_crystal_size_max           0.30 
_exptl_crystal_size_mid           0.24 
_exptl_crystal_size_min           0.22 
_exptl_crystal_density_meas       ? 
_exptl_crystal_density_diffrn     1.520 
_exptl_crystal_density_method     'not measured' 
_exptl_crystal_F_000              645 
_exptl_absorpt_coefficient_mu     1.011 
_exptl_absorpt_correction_type    'multi-scan'
_exptl_absorpt_correction_T_min   0.75 
_exptl_absorpt_correction_T_max   0.81 
_exptl_absorpt_process_details    'SADABS(Bruker, 2000)' 
 
_exptl_special_details 
; 
 ? 
; 
 
_diffrn_ambient_temperature       291(2) 
_diffrn_radiation_wavelength      0.71073 
_diffrn_radiation_type            MoK\a 
_diffrn_radiation_source          'fine-focus sealed tube' 
_diffrn_radiation_monochromator   graphite 
_diffrn_measurement_device_type   ? 
_diffrn_measurement_method        ? 
_diffrn_detector_area_resol_mean  ? 
_diffrn_standards_number          ? 
_diffrn_standards_interval_count  ? 
_diffrn_standards_interval_time   ? 
_diffrn_standards_decay_%         ? 
_diffrn_reflns_number             12695 
_diffrn_reflns_av_R_equivalents   0.0302 
_diffrn_reflns_av_sigmaI/netI     0.0399 
_diffrn_reflns_limit_h_min        -13 
_diffrn_reflns_limit_h_max        13 
_diffrn_reflns_limit_k_min        -14 
_diffrn_reflns_limit_k_max        14 
_diffrn_reflns_limit_l_min        -14 
_diffrn_reflns_limit_l_max        15 
_diffrn_reflns_theta_min          1.77 
_diffrn_reflns_theta_max          26.00 
_reflns_number_total              5342 
_reflns_number_gt                 4506 
_reflns_threshold_expression      >2sigma(I) 
 
_computing_data_collection      'SMART (Bruker, 2000)'
_computing_cell_refinement      'SMART'
_computing_data_reduction       'SAINT (Bruker, 2000)'
_computing_structure_solution   'SHELXTL (Bruker, 2000)'
_computing_structure_refinement 'SHELXTL'
_computing_molecular_graphics   'SHELXTL'
_computing_publication_material 'SHELXTL' 
 
_refine_special_details 
; 
 Refinement of F^2^ against ALL reflections.  The weighted R-factor wR and 
 goodness of fit S are based on F^2^, conventional R-factors R are based 
 on F, with F set to zero for negative F^2^. The threshold expression of 
 F^2^ > 2sigma(F^2^) is used only for calculating R-factors(gt) etc. and is 
 not relevant to the choice of reflections for refinement.  R-factors based 
 on F^2^ are statistically about twice as large as those based on F, and R- 
 factors based on ALL data will be even larger. 
; 
 
_refine_ls_structure_factor_coef  Fsqd  
_refine_ls_matrix_type            full 
_refine_ls_weighting_scheme       calc  
_refine_ls_weighting_details 
 'calc w=1/[\s^2^(Fo^2^)+(0.0600P)^2^+1.8800P] where P=(Fo^2^+2Fc^2^)/3' 
_atom_sites_solution_primary      direct 
_atom_sites_solution_secondary    difmap 
_atom_sites_solution_hydrogens    geom 
_refine_ls_hydrogen_treatment     constr
_refine_ls_extinction_method      none 
_refine_ls_extinction_coef        ? 
_refine_ls_number_reflns          5342 
_refine_ls_number_parameters      337 
_refine_ls_number_restraints      0 
_refine_ls_R_factor_all           0.0668 
_refine_ls_R_factor_gt            0.0547 
_refine_ls_wR_factor_ref          0.1280 
_refine_ls_wR_factor_gt           0.1232 
_refine_ls_goodness_of_fit_ref    1.009 
_refine_ls_restrained_S_all       1.009 
_refine_ls_shift/su_max           0.000 
_refine_ls_shift/su_mean          0.000 
 
loop_ 
 _atom_site_label 
 _atom_site_type_symbol 
 _atom_site_fract_x 
 _atom_site_fract_y 
 _atom_site_fract_z 
 _atom_site_U_iso_or_equiv 
 _atom_site_adp_type 
 _atom_site_occupancy 
 _atom_site_symmetry_multiplicity 
 _atom_site_calc_flag 
 _atom_site_refinement_flags 
 _atom_site_disorder_assembly 
 _atom_site_disorder_group 
C1 C 0.0999(4) 0.6940(4) 0.0347(3) 0.0450(9) Uani 1 1 d . . . 
H1 H 0.1883 0.7213 0.0268 0.054 Uiso 1 1 calc R . . 
C2 C -0.0124(5) 0.6176(5) -0.0634(4) 0.0545(11) Uani 1 1 d . . . 
H2 H -0.0003 0.5958 -0.1365 0.065 Uiso 1 1 calc R . . 
C3 C -0.1417(4) 0.5753(4) -0.0495(4) 0.0536(11) Uani 1 1 d . . . 
H3 H -0.2192 0.5207 -0.1132 0.064 Uiso 1 1 calc R . . 
C4 C -0.1570(4) 0.6114(5) 0.0539(4) 0.0512(11) Uani 1 1 d . . . 
H4 H -0.2452 0.5843 0.0619 0.061 Uiso 1 1 calc R . . 
C5 C -0.0429(4) 0.6895(4) 0.1508(3) 0.0394(9) Uani 1 1 d . . . 
C6 C -0.0510(4) 0.7314(4) 0.2685(3) 0.0480(10) Uani 1 1 d . . . 
C7 C -0.1674(4) 0.7068(5) 0.3011(4) 0.0513(11) Uani 1 1 d . . . 
H7 H -0.2530 0.6547 0.2454 0.062 Uiso 1 1 calc R . . 
C8 C -0.1621(4) 0.7572(5) 0.4150(4) 0.0514(11) Uani 1 1 d . . . 
H8 H -0.2418 0.7400 0.4372 0.062 Uiso 1 1 calc R . . 
C9 C -0.0353(5) 0.8326(5) 0.4923(4) 0.0516(11) Uani 1 1 d . . . 
H9 H -0.0278 0.8677 0.5697 0.062 Uiso 1 1 calc R . . 
C10 C 0.0831(4) 0.8590(4) 0.4599(3) 0.0421(9) Uani 1 1 d . . . 
H10 H 0.1690 0.9123 0.5151 0.051 Uiso 1 1 calc R . . 
C11 C 0.6168(5) 0.9007(5) 0.1757(4) 0.0602(12) Uani 1 1 d . . . 
H11 H 0.5825 0.8048 0.1456 0.072 Uiso 1 1 calc R . . 
C12 C 0.5910(4) 0.9464(4) 0.0774(4) 0.0521(11) Uani 1 1 d . . . 
H12A H 0.6187 1.0402 0.1048 0.063 Uiso 1 1 calc R . . 
H12B H 0.4928 0.8974 0.0376 0.063 Uiso 1 1 calc R . . 
C13 C 0.6708(5) 0.9274(5) -0.0088(4) 0.0568(11) Uani 1 1 d . . . 
H13A H 0.6386 0.8331 -0.0409 0.068 Uiso 1 1 calc R . . 
H13B H 0.6537 0.9615 -0.0726 0.068 Uiso 1 1 calc R . . 
C14 C 0.8225(5) 0.9996(6) 0.0518(5) 0.0643(13) Uani 1 1 d . . . 
H14A H 0.8730 0.9913 -0.0034 0.077 Uiso 1 1 calc R . . 
H14B H 0.8549 1.0935 0.0858 0.077 Uiso 1 1 calc R . . 
C15 C 0.8453(5) 0.9414(5) 0.1418(4) 0.0576(12) Uani 1 1 d . . . 
H15A H 0.9436 0.9814 0.1786 0.069 Uiso 1 1 calc R . . 
H15B H 0.8075 0.8462 0.1086 0.069 Uiso 1 1 calc R . . 
C16 C 0.7724(4) 0.9679(5) 0.2328(4) 0.0511(11) Uani 1 1 d . . . 
H16A H 0.7893 0.9332 0.2962 0.061 Uiso 1 1 calc R . . 
H16B H 0.8099 1.0632 0.2648 0.061 Uiso 1 1 calc R . . 
C17 C 0.2325(4) 0.6151(3) 0.3967(3) 0.0373(8) Uani 1 1 d . . . 
C18 C 0.1497(5) 0.4798(4) 0.4106(4) 0.0584(12) Uani 1 1 d . . . 
H18A H 0.0723 0.4752 0.4364 0.088 Uiso 1 1 calc R . . 
H18B H 0.2068 0.4648 0.4670 0.088 Uiso 1 1 calc R . . 
H18C H 0.1169 0.4129 0.3372 0.088 Uiso 1 1 calc R . . 
C19 C 0.2976(3) 1.1284(3) 0.3127(3) 0.0307(7) Uani 1 1 d . . . 
C20 C 0.2517(4) 1.2209(4) 0.2720(4) 0.0476(10) Uani 1 1 d . . . 
H20A H 0.1646 1.1687 0.2128 0.071 Uiso 1 1 calc R . . 
H20B H 0.3196 1.2789 0.2409 0.071 Uiso 1 1 calc R . . 
H20C H 0.2419 1.2733 0.3367 0.071 Uiso 1 1 calc R . . 
Cr1 Cr 0.51313(5) 1.12022(5) 0.48090(4) 0.02930(15) Uani 0.25 1 d P . . 
Cr2 Cr 0.24424(6) 0.83936(5) 0.29043(5) 0.03787(17) Uani 0.25 1 d P . . 
Mn1 Mn 0.51313(5) 1.12022(5) 0.48090(4) 0.02930(15) Uani 0.75 1 d P . . 
Mn2 Mn 0.24424(6) 0.83936(5) 0.29043(5) 0.03787(17) Uani 0.75 1 d P . . 
N1 N 0.0855(3) 0.7306(3) 0.1426(3) 0.0337(6) Uani 1 1 d . . . 
N2 N 0.0754(3) 0.8083(3) 0.3497(3) 0.0348(7) Uani 1 1 d . . . 
O1 O 0.1918(3) 0.6435(2) 0.3125(2) 0.0420(6) Uani 1 1 d . . . 
O2 O 0.3404(3) 0.6933(3) 0.4828(2) 0.0453(7) Uani 1 1 d . . . 
O3 O 0.3975(3) 1.1830(3) 0.4022(2) 0.0434(7) Uani 1 1 d . . . 
O4 O 0.2331(3) 1.0098(2) 0.2564(2) 0.0430(7) Uani 1 1 d . . . 
O5 O 0.5525(3) 0.8535(3) 0.3689(2) 0.0432(6) Uani 1 1 d . . . 
O6 O 0.5769(3) 1.0687(3) 0.3361(2) 0.0408(6) Uani 1 1 d . . . 
O7 O 0.3747(2) 0.8476(3) 0.20974(19) 0.0370(6) Uani 1 1 d . . . 
O8 O 0.3727(3) 0.9344(3) 0.4335(2) 0.0441(7) Uani 1 1 d . . . 
O1W O 0.4671(4) 0.5793(3) 0.2923(3) 0.0638(9) Uani 1 1 d . . . 
H1WD H 0.4832 0.5392 0.2361 0.077 Uiso 1 1 d R . . 
H1WA H 0.5208 0.6630 0.3108 0.077 Uiso 1 1 d R . . 
O2W O 0.5000 0.5000 0.5000 0.0730(15) Uani 1 2 d S . . 
H2WA H 0.5513 0.4734 0.5323 0.109 Uiso 0.50 1 d PR . . 
H2WB H 0.5289 0.5808 0.5369 0.109 Uiso 0.50 1 d PR . . 
O3W O 0.5116(7) 0.4666(7) 0.0989(6) 0.083(3) Uani 0.50 1 d P . . 
H3WA H 0.5645 0.4360 0.0845 0.125 Uiso 0.50 1 d PR . . 
H3WB H 0.4306 0.4144 0.0531 0.125 Uiso 0.50 1 d PR . . 
O5W O 0.7478(8) 0.2422(8) 0.2617(7) 0.086(3) Uani 0.50 1 d P . . 
H5WA H 0.7657 0.2294 0.3273 0.130 Uiso 0.50 1 d PR . . 
H5WC H 0.8227 0.2939 0.2494 0.130 Uiso 0.50 1 d PR . . 
P1 P 0.52896(10) 0.92269(11) 0.28038(9) 0.0414(2) Uani 1 1 d . . . 
O4W O 0.6357(3) 0.3224(3) 0.2620(2) 0.0463(7) Uiso 1 1 d . . . 
H4WD H 0.5983 0.3485 0.2139 0.056 Uiso 1 1 d R . . 
H4WB H 0.5754 0.2646 0.2849 0.056 Uiso 1 1 d R . . 
 
loop_ 
 _atom_site_aniso_label 
 _atom_site_aniso_U_11 
 _atom_site_aniso_U_22 
 _atom_site_aniso_U_33 
 _atom_site_aniso_U_23 
 _atom_site_aniso_U_13 
 _atom_site_aniso_U_12 
C1 0.051(2) 0.038(2) 0.036(2) 0.0037(16) 0.0055(17) 0.0194(19) 
C2 0.058(3) 0.054(3) 0.036(2) -0.0028(18) 0.0052(19) 0.024(2) 
C3 0.042(2) 0.037(2) 0.047(2) -0.0008(18) -0.0117(18) 0.0039(18) 
C4 0.0254(18) 0.060(3) 0.060(3) 0.011(2) 0.0128(18) 0.0170(19) 
C5 0.0253(17) 0.0313(18) 0.050(2) 0.0001(16) 0.0054(15) 0.0111(15) 
C6 0.040(2) 0.043(2) 0.035(2) -0.0047(17) -0.0017(16) 0.0095(18) 
C7 0.0203(17) 0.066(3) 0.057(3) 0.012(2) 0.0058(17) 0.0168(18) 
C8 0.0241(18) 0.066(3) 0.069(3) 0.029(2) 0.0230(19) 0.0200(19) 
C9 0.055(3) 0.062(3) 0.045(2) 0.016(2) 0.026(2) 0.030(2) 
C10 0.0320(19) 0.043(2) 0.037(2) 0.0018(16) 0.0082(15) 0.0113(17) 
C11 0.053(3) 0.049(3) 0.057(3) -0.006(2) -0.002(2) 0.022(2) 
C12 0.040(2) 0.045(2) 0.070(3) 0.025(2) 0.014(2) 0.0174(19) 
C13 0.044(2) 0.060(3) 0.058(3) 0.016(2) 0.022(2) 0.018(2) 
C14 0.052(3) 0.069(3) 0.072(3) 0.031(3) 0.021(2) 0.025(2) 
C15 0.070(3) 0.069(3) 0.063(3) 0.030(2) 0.043(2) 0.047(3) 
C16 0.047(2) 0.067(3) 0.044(2) 0.002(2) 0.0185(19) 0.036(2) 
C17 0.0315(18) 0.0265(17) 0.042(2) -0.0068(15) 0.0120(15) 0.0111(15) 
C18 0.067(3) 0.025(2) 0.054(3) 0.0070(18) -0.001(2) 0.0074(19) 
C19 0.0303(17) 0.0352(18) 0.0215(15) 0.0049(13) 0.0128(13) 0.0117(15) 
C20 0.051(2) 0.050(2) 0.039(2) 0.0107(18) 0.0045(18) 0.026(2) 
Cr1 0.0258(3) 0.0296(3) 0.0225(3) 0.0057(2) 0.00379(19) 0.0074(2) 
Cr2 0.0346(3) 0.0236(3) 0.0343(3) -0.0009(2) -0.0005(2) 0.0044(2) 
Mn1 0.0258(3) 0.0296(3) 0.0225(3) 0.0057(2) 0.00379(19) 0.0074(2) 
Mn2 0.0346(3) 0.0236(3) 0.0343(3) -0.0009(2) -0.0005(2) 0.0044(2) 
N1 0.0221(14) 0.0352(16) 0.0339(15) 0.0029(12) 0.0021(11) 0.0110(12) 
N2 0.0264(14) 0.0337(16) 0.0334(16) 0.0053(12) 0.0044(12) 0.0093(13) 
O1 0.0578(17) 0.0269(13) 0.0409(15) 0.0116(11) 0.0039(12) 0.0235(13) 
O2 0.0419(15) 0.0298(13) 0.0423(15) 0.0089(11) 0.0039(12) 0.0036(12) 
O3 0.0470(15) 0.0322(13) 0.0415(15) 0.0043(11) -0.0114(12) 0.0225(12) 
O4 0.0330(13) 0.0217(12) 0.0515(16) 0.0114(11) -0.0057(11) 0.0008(10) 
O5 0.0493(16) 0.0497(16) 0.0312(13) -0.0023(11) 0.0070(11) 0.0321(14) 
O6 0.0408(14) 0.0404(14) 0.0256(12) 0.0071(11) 0.0082(10) 0.0088(12) 
O7 0.0338(13) 0.0488(15) 0.0197(11) -0.0078(10) 0.0043(9) 0.0213(12) 
O8 0.0333(13) 0.0387(15) 0.0312(13) -0.0033(11) -0.0059(10) 0.0045(11) 
O1W 0.067(2) 0.055(2) 0.073(2) 0.0171(17) 0.0298(18) 0.0310(17) 
O2W 0.068(3) 0.075(3) 0.065(3) 0.020(3) -0.012(2) 0.039(3) 
O3W 0.051(4) 0.070(5) 0.064(4) -0.035(4) 0.033(3) -0.007(3) 
O5W 0.073(5) 0.083(5) 0.082(5) -0.015(4) 0.023(4) 0.037(4) 
P1 0.0268(5) 0.0459(6) 0.0386(5) 0.0033(4) 0.0078(4) 0.0116(4) 
 
_geom_special_details 
; 
 All esds (except the esd in the dihedral angle between two l.s. planes) 
 are estimated using the full covariance matrix.  The cell esds are taken 
 into account individually in the estimation of esds in distances, angles 
 and torsion angles; correlations between esds in cell parameters are only 
 used when they are defined by crystal symmetry.  An approximate (isotropic) 
 treatment of cell esds is used for estimating esds involving l.s. planes. 
; 
 
loop_ 
 _geom_bond_atom_site_label_1 
 _geom_bond_atom_site_label_2 
 _geom_bond_distance 
 _geom_bond_site_symmetry_2 
 _geom_bond_publ_flag 
C1 N1 1.366(5) . ? 
C1 C2 1.384(6) . ? 
C1 H1 0.9300 . ? 
C2 C3 1.369(7) . ? 
C2 H2 0.9300 . ? 
C3 C4 1.317(6) . ? 
C3 H3 0.9300 . ? 
C4 C5 1.388(5) . ? 
C4 H4 0.9300 . ? 
C5 N1 1.336(5) . ? 
C5 C6 1.459(6) . ? 
C6 C7 1.359(6) . ? 
C6 N2 1.368(5) . ? 
C7 C8 1.384(6) . ? 
C7 H7 0.9300 . ? 
C8 C9 1.350(6) . ? 
C8 H8 0.9300 . ? 
C9 C10 1.376(5) . ? 
C9 H9 0.9300 . ? 
C10 N2 1.336(5) . ? 
C10 H10 0.9300 . ? 
C11 C12 1.442(7) . ? 
C11 C16 1.529(6) . ? 
C11 P1 1.792(5) . ? 
C11 H11 0.9800 . ? 
C12 C13 1.542(6) . ? 
C12 H12A 0.9700 . ? 
C12 H12B 0.9700 . ? 
C13 C14 1.497(6) . ? 
C13 H13A 0.9700 . ? 
C13 H13B 0.9700 . ? 
C14 C15 1.445(7) . ? 
C14 H14A 0.9700 . ? 
C14 H14B 0.9700 . ? 
C15 C16 1.554(5) . ? 
C15 H15A 0.9700 . ? 
C15 H15B 0.9700 . ? 
C16 H16A 0.9700 . ? 
C16 H16B 0.9700 . ? 
C17 O1 1.221(5) . ? 
C17 O2 1.280(4) . ? 
C17 C18 1.499(6) . ? 
C18 H18A 0.9600 . ? 
C18 H18B 0.9600 . ? 
C18 H18C 0.9600 . ? 
C19 O4 1.228(4) . ? 
C19 O3 1.247(4) . ? 
C19 C20 1.524(5) . ? 
C20 H20A 0.9600 . ? 
C20 H20B 0.9600 . ? 
C20 H20C 0.9600 . ? 
Cr1 O8 1.929(3) 2_676 ? 
Cr1 O8 1.931(3) . ? 
Cr1 O2 1.968(3) 2_676 ? 
Cr1 O3 1.973(2) . ? 
Cr1 O6 2.102(3) . ? 
Cr1 O5 2.109(3) 2_676 ? 
Cr1 Cr1 2.8437(12) 2_676 ? 
Cr1 Mn1 2.8437(12) 2_676 ? 
Cr2 O8 1.835(3) . ? 
Cr2 O7 1.882(2) . ? 
Cr2 N1 2.025(3) . ? 
Cr2 N2 2.056(3) . ? 
Cr2 O4 2.174(3) . ? 
Cr2 O1 2.188(3) . ? 
O2 Mn1 1.968(3) 2_676 ? 
O2 Cr1 1.968(3) 2_676 ? 
O5 P1 1.526(3) . ? 
O5 Mn1 2.109(3) 2_676 ? 
O5 Cr1 2.109(3) 2_676 ? 
O6 P1 1.519(3) . ? 
O7 P1 1.547(3) . ? 
O8 Mn1 1.929(3) 2_676 ? 
O8 Cr1 1.929(3) 2_676 ? 
O1W H1WD 0.8500 . ? 
O1W H1WA 0.8500 . ? 
O2W H2WA 0.8500 . ? 
O2W H2WB 0.8501 . ? 
O3W H3WA 0.8501 . ? 
O3W H3WB 0.8500 . ? 
O5W H5WA 0.8500 . ? 
O5W H5WC 0.8500 . ? 
O4W H4WD 0.8475 . ? 
O4W H4WB 0.8500 . ? 
 
loop_ 
 _geom_angle_atom_site_label_1 
 _geom_angle_atom_site_label_2 
 _geom_angle_atom_site_label_3 
 _geom_angle 
 _geom_angle_site_symmetry_1 
 _geom_angle_site_symmetry_3 
 _geom_angle_publ_flag 
N1 C1 C2 122.3(4) . . ? 
N1 C1 H1 118.8 . . ? 
C2 C1 H1 118.8 . . ? 
C3 C2 C1 117.9(4) . . ? 
C3 C2 H2 121.0 . . ? 
C1 C2 H2 121.0 . . ? 
C4 C3 C2 120.3(4) . . ? 
C4 C3 H3 119.8 . . ? 
C2 C3 H3 119.8 . . ? 
C3 C4 C5 120.8(4) . . ? 
C3 C4 H4 119.6 . . ? 
C5 C4 H4 119.6 . . ? 
N1 C5 C4 121.3(4) . . ? 
N1 C5 C6 114.5(3) . . ? 
C4 C5 C6 124.2(4) . . ? 
C7 C6 N2 119.6(4) . . ? 
C7 C6 C5 126.8(4) . . ? 
N2 C6 C5 113.5(4) . . ? 
C6 C7 C8 121.8(4) . . ? 
C6 C7 H7 119.1 . . ? 
C8 C7 H7 119.1 . . ? 
C9 C8 C7 116.7(4) . . ? 
C9 C8 H8 121.7 . . ? 
C7 C8 H8 121.7 . . ? 
C8 C9 C10 121.9(4) . . ? 
C8 C9 H9 119.0 . . ? 
C10 C9 H9 119.0 . . ? 
N2 C10 C9 120.3(4) . . ? 
N2 C10 H10 119.8 . . ? 
C9 C10 H10 119.8 . . ? 
C12 C11 C16 110.0(4) . . ? 
C12 C11 P1 113.6(4) . . ? 
C16 C11 P1 111.1(3) . . ? 
C12 C11 H11 107.3 . . ? 
C16 C11 H11 107.3 . . ? 
P1 C11 H11 107.3 . . ? 
C11 C12 C13 111.5(4) . . ? 
C11 C12 H12A 109.3 . . ? 
C13 C12 H12A 109.3 . . ? 
C11 C12 H12B 109.3 . . ? 
C13 C12 H12B 109.3 . . ? 
H12A C12 H12B 108.0 . . ? 
C14 C13 C12 110.1(4) . . ? 
C14 C13 H13A 109.6 . . ? 
C12 C13 H13A 109.6 . . ? 
C14 C13 H13B 109.6 . . ? 
C12 C13 H13B 109.6 . . ? 
H13A C13 H13B 108.1 . . ? 
C15 C14 C13 108.3(4) . . ? 
C15 C14 H14A 110.0 . . ? 
C13 C14 H14A 110.0 . . ? 
C15 C14 H14B 110.0 . . ? 
C13 C14 H14B 110.0 . . ? 
H14A C14 H14B 108.4 . . ? 
C14 C15 C16 107.8(4) . . ? 
C14 C15 H15A 110.2 . . ? 
C16 C15 H15A 110.2 . . ? 
C14 C15 H15B 110.2 . . ? 
C16 C15 H15B 110.2 . . ? 
H15A C15 H15B 108.5 . . ? 
C11 C16 C15 110.1(4) . . ? 
C11 C16 H16A 109.6 . . ? 
C15 C16 H16A 109.6 . . ? 
C11 C16 H16B 109.6 . . ? 
C15 C16 H16B 109.6 . . ? 
H16A C16 H16B 108.1 . . ? 
O1 C17 O2 126.3(4) . . ? 
O1 C17 C18 120.4(3) . . ? 
O2 C17 C18 113.1(4) . . ? 
C17 C18 H18A 109.5 . . ? 
C17 C18 H18B 109.5 . . ? 
H18A C18 H18B 109.5 . . ? 
C17 C18 H18C 109.5 . . ? 
H18A C18 H18C 109.5 . . ? 
H18B C18 H18C 109.5 . . ? 
O4 C19 O3 126.9(3) . . ? 
O4 C19 C20 117.9(3) . . ? 
O3 C19 C20 115.2(3) . . ? 
C19 C20 H20A 109.5 . . ? 
C19 C20 H20B 109.5 . . ? 
H20A C20 H20B 109.5 . . ? 
C19 C20 H20C 109.5 . . ? 
H20A C20 H20C 109.5 . . ? 
H20B C20 H20C 109.5 . . ? 
O8 Cr1 O8 85.10(11) 2_676 . ? 
O8 Cr1 O2 95.49(12) 2_676 2_676 ? 
O8 Cr1 O2 175.36(12) . 2_676 ? 
O8 Cr1 O3 176.59(11) 2_676 . ? 
O8 Cr1 O3 96.52(12) . . ? 
O2 Cr1 O3 83.13(12) 2_676 . ? 
O8 Cr1 O6 87.30(12) 2_676 . ? 
O8 Cr1 O6 85.93(11) . . ? 
O2 Cr1 O6 89.50(12) 2_676 . ? 
O3 Cr1 O6 95.80(12) . . ? 
O8 Cr1 O5 86.30(11) 2_676 2_676 ? 
O8 Cr1 O5 88.13(12) . 2_676 ? 
O2 Cr1 O5 96.50(12) 2_676 2_676 ? 
O3 Cr1 O5 90.75(12) . 2_676 ? 
O6 Cr1 O5 171.61(11) . 2_676 ? 
O8 Cr1 Cr1 42.58(8) 2_676 2_676 ? 
O8 Cr1 Cr1 42.52(9) . 2_676 ? 
O2 Cr1 Cr1 137.89(9) 2_676 2_676 ? 
O3 Cr1 Cr1 138.96(9) . 2_676 ? 
O6 Cr1 Cr1 85.40(8) . 2_676 ? 
O5 Cr1 Cr1 86.22(9) 2_676 2_676 ? 
O8 Cr1 Mn1 42.58(8) 2_676 2_676 ? 
O8 Cr1 Mn1 42.52(9) . 2_676 ? 
O2 Cr1 Mn1 137.89(9) 2_676 2_676 ? 
O3 Cr1 Mn1 138.96(9) . 2_676 ? 
O6 Cr1 Mn1 85.40(8) . 2_676 ? 
O5 Cr1 Mn1 86.22(9) 2_676 2_676 ? 
Cr1 Cr1 Mn1 0.000(19) 2_676 2_676 ? 
O8 Cr2 O7 94.77(12) . . ? 
O8 Cr2 N1 173.30(13) . . ? 
O7 Cr2 N1 91.88(11) . . ? 
O8 Cr2 N2 95.69(13) . . ? 
O7 Cr2 N2 169.50(11) . . ? 
N1 Cr2 N2 77.65(12) . . ? 
O8 Cr2 O4 94.96(12) . . ? 
O7 Cr2 O4 96.26(12) . . ? 
N1 Cr2 O4 85.14(12) . . ? 
N2 Cr2 O4 83.73(12) . . ? 
O8 Cr2 O1 95.12(12) . . ? 
O7 Cr2 O1 95.63(12) . . ? 
N1 Cr2 O1 83.37(12) . . ? 
N2 Cr2 O1 82.55(12) . . ? 
O4 Cr2 O1 163.70(10) . . ? 
C5 N1 C1 117.3(3) . . ? 
C5 N1 Cr2 118.1(3) . . ? 
C1 N1 Cr2 124.6(3) . . ? 
C10 N2 C6 119.6(3) . . ? 
C10 N2 Cr2 124.1(2) . . ? 
C6 N2 Cr2 116.3(3) . . ? 
C17 O1 Cr2 129.6(2) . . ? 
C17 O2 Mn1 133.2(3) . 2_676 ? 
C17 O2 Cr1 133.2(3) . 2_676 ? 
C19 O3 Cr1 132.6(2) . . ? 
C19 O4 Cr2 131.1(2) . . ? 
P1 O5 Mn1 117.63(15) . 2_676 ? 
P1 O5 Cr1 117.63(15) . 2_676 ? 
P1 O6 Cr1 118.68(15) . . ? 
P1 O7 Cr2 118.04(13) . . ? 
Cr2 O8 Mn1 126.68(15) . 2_676 ? 
Cr2 O8 Cr1 126.68(15) . 2_676 ? 
Cr2 O8 Cr1 126.23(16) . . ? 
Mn1 O8 Cr1 94.90(11) 2_676 . ? 
Cr1 O8 Cr1 94.90(11) 2_676 . ? 
H1WD O1W H1WA 110.3 . . ? 
H2WA O2W H2WB 109.5 . . ? 
H3WA O3W H3WB 109.5 . . ? 
H5WA O5W H5WC 109.5 . . ? 
O6 P1 O5 112.83(15) . . ? 
O6 P1 O7 110.42(16) . . ? 
O5 P1 O7 110.07(17) . . ? 
O6 P1 C11 112.2(2) . . ? 
O5 P1 C11 106.5(2) . . ? 
O7 P1 C11 104.47(17) . . ? 
H4WD O4W H4WB 111.0 . . ? 
 
_diffrn_measured_fraction_theta_max    1.000 
_diffrn_reflns_theta_full              26.00 
_diffrn_measured_fraction_theta_full   1.000 
_refine_diff_density_max    0.305 
_refine_diff_density_min   -0.510 
_refine_diff_density_rms    0.071 
